# Supplementary material for: Effect of base sequence context on the conformational heterogeneity of aristolactam-I adducted DNA: structural and energetic insights into sequence-dependent repair and mutagenicity
Source: Royal Society of Chemistry journal article supplement (doi:10.1039/c5tx00302d), 2015-10-23
Supplement: c5tx00302d1.pdf [file c5tx00302d1.pdf]

# Effect of base sequence context on the conformational heterogeneity of aristolactam-I adducted DNA: structural and energetic insights into sequence-dependent repair and mutagenicity

Preetleen Kathuria,<sup>1</sup> Purshotam Sharma<sup>1,2</sup> and Stacey D. Wetmore<sup>1\*</sup>

<sup>1</sup>Department of Chemistry and Biochemistry, University of Lethbridge, 4401 University Drive West, Lethbridge, Alberta Canada T1K 3M4

<sup>2</sup>Centre for Computational Sciences, Central University of Punjab, Bathinda, Punjab India 151001

## Supporting Information

(13 Pages)

|                                                                                                                                                                                                       |     |
|-------------------------------------------------------------------------------------------------------------------------------------------------------------------------------------------------------|-----|
| <b>Figures S1-S3.</b> Radar plots for the probability distributions of $\chi$ , $\theta$ and $\phi$ .....                                                                                             | S2  |
| <b>Table S1.</b> RMSD of all heavy atoms in the lesion site trimer in the base-displaced intercalated adducted DNA conformations during 20 and 320 ns MD simulations in the CXC sequence context..... | S6  |
| <b>Table S2.</b> Backbone RMSD for all adducted DNA conformations in different sequence contexts.....                                                                                                 | S5  |
| <b>Table S3.</b> The hydrogen-bonding occupancies in the trimers composed of the damaged base pair and the 3' and 5'-flanking base pairs in different sequence contexts.....                          | S7  |
| <b>Table S4.</b> Pseudostep parameters and minor groove width for all adducted DNA conformers in different sequence contexts.....                                                                     | S12 |
| <b>Table S5.</b> Interaction energies between the damaged base and its opposing thymine for different base-displaced intercalated conformations of ALI-N <sup>6</sup> -dA adducted DNA.....           | S13 |

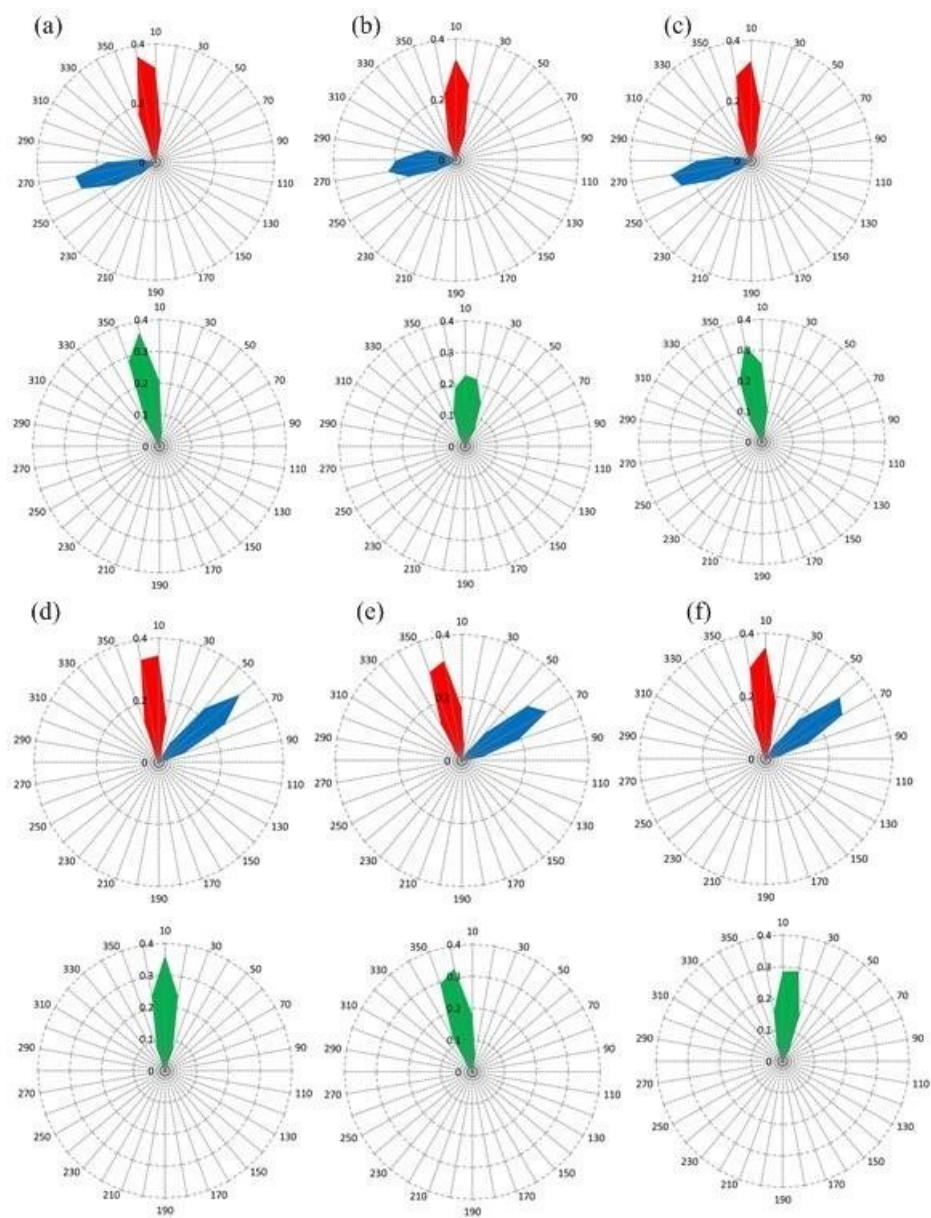

**Figure S1.** Radar plots for the probability distributions of  $\chi$  (blue),  $\theta$  (red) and  $\phi$  (green) for *anti* (a, b and c) or *syn* (d, e and f) ALI-N<sup>6</sup>-dA in the GXG sequence in the base-displaced intercalated (a and d), 5'-intercalated (b and e) or 3'-intercalated (c and f) adducted DNA conformations.

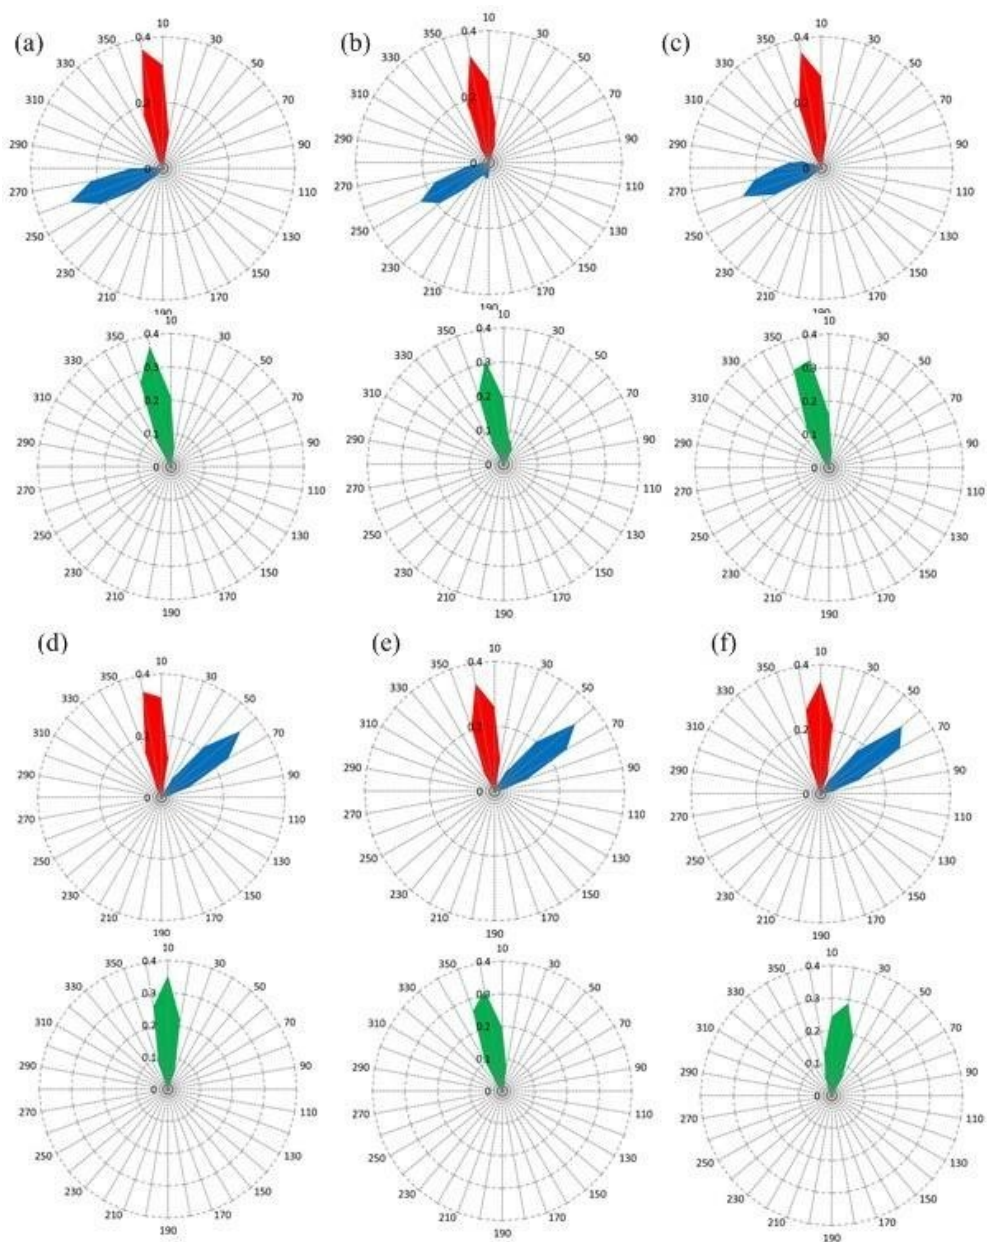

**Figure S2.** Radar plots for the probability distributions of  $\chi$  (blue),  $\theta$  (red) and  $\phi$  (green) for *anti* (a, b and c) or *syn* (d, e and f) ALI-N<sup>6</sup>-dA in the CXG sequence in the base-displaced intercalated (a and d), 5'-intercalated (b and e) or 3'-intercalated (c and f) adducted DNA conformations.

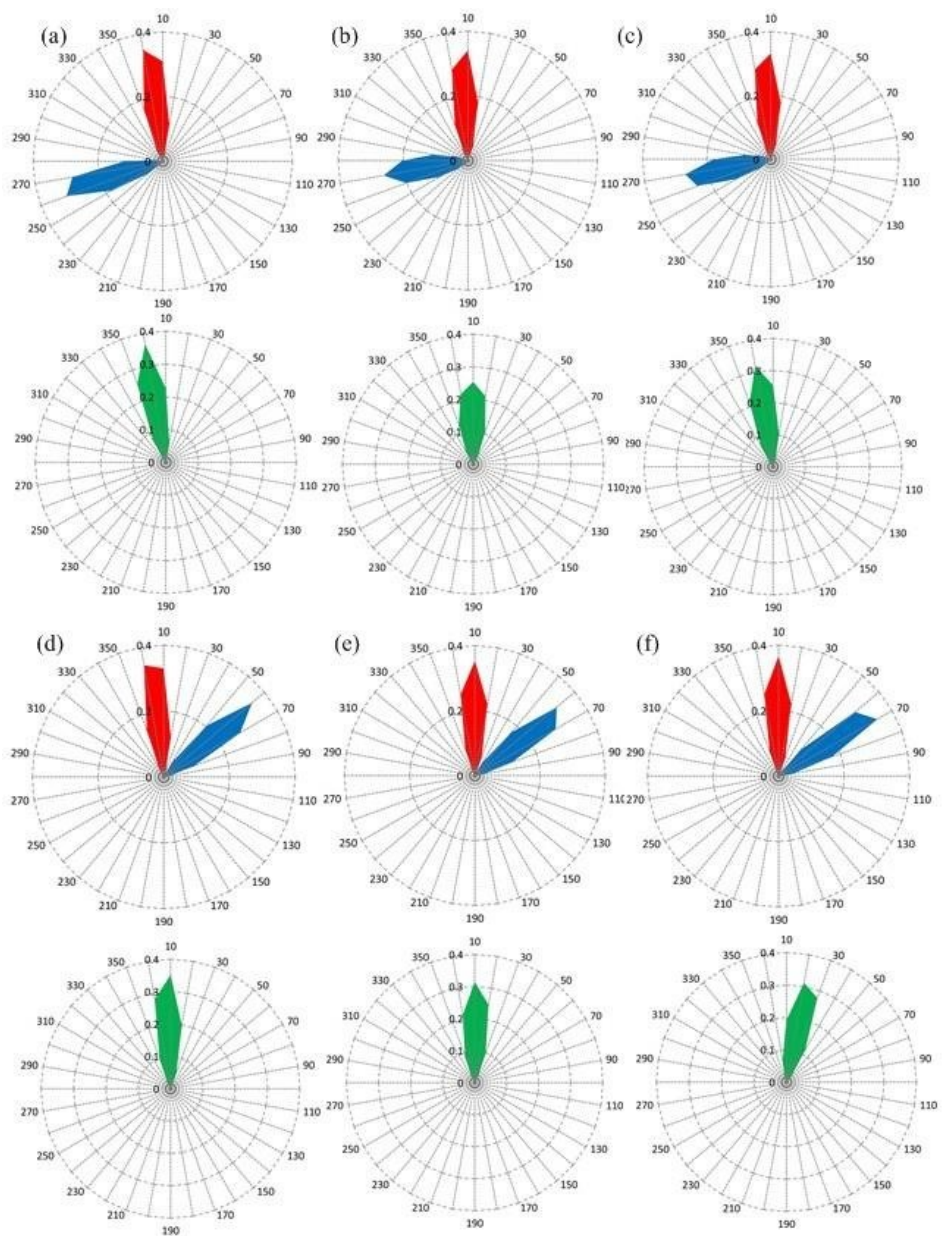

**Figure S3.** Radar plots for the probability distributions of  $\chi$  (blue),  $\theta$  (red) and  $\phi$  (green) for *anti* (a, b and c) or *syn* (d, e and f) ALI-N<sup>6</sup>-dA in the GXC sequence in the base-displaced intercalated (a and d), 5'-intercalated (b and e) or 3'-intercalated (c and f) adducted DNA conformations.

**Table S1:** RMSD of all heavy atoms in the trimer containing the damaged base pair and the 5' and 3'–flanking bases in the base-displaced intercalated adducted DNA conformations during 20 and 320 ns simulations in the CXC sequence context.

| Conformer                               | RMSD (Å) |          |
|-----------------------------------------|----------|----------|
|                                         | 20 ns    | 320 ns   |
| <i>anti</i> base-displaced intercalated | 0.82±0.2 | 0.96±0.3 |
| <i>syn</i> base-displaced intercalated  | 1.09±0.2 | 1.21±0.3 |

**Table S2:** Backbone RMSD for each adducted DNA conformation in different sequence contexts.

| Sequence Context | Conformers                  | RMSD (Å)   |
|------------------|-----------------------------|------------|
| <b>GXG</b>       | <i>anti</i> base-displaced  | 1.82±0.33  |
|                  | <i>anti</i> 5'–intercalated | 4.11±1.51  |
|                  | <i>anti</i> 3'–intercalated | 3.33±0.63  |
|                  | <i>syn</i> base-displaced   | 2.05 ±0.37 |
|                  | <i>syn</i> 5'–intercalated  | 3.73 ±0.77 |
|                  | <i>syn</i> 3'–intercalated  | 2.21±0.53  |
| <b>CXG</b>       | <i>anti</i> base-displaced  | 1.90±0.39  |
|                  | <i>anti</i> 5'–intercalated | 2.24±0.46  |
|                  | <i>anti</i> 3'–intercalated | 3.11±0.75  |
|                  | <i>syn</i> base-displaced   | 2.19±0.46  |
|                  | <i>syn</i> 5'–intercalated  | 2.67±0.47  |
|                  | <i>syn</i> 3'–intercalated  | 2.21±0.55  |
| <b>GXC</b>       | <i>anti</i> base-displaced  | 2.04 ±0.40 |
|                  | <i>anti</i> 5'–intercalated | 2.94±0.91  |
|                  | <i>anti</i> 3'–intercalated | 2.71±0.58  |
|                  | <i>syn</i> base-displaced   | 2.04±0.41  |
|                  | <i>syn</i> 5'–intercalated  | 3.01±0.76  |
|                  | <i>syn</i> 3'–intercalated  | 2.89±0.72  |

**Table S3:** The hydrogen-bonding occupancies in the trimers composed of the damaged base pair and the 3' and 5'-flanking base pairs in different sequence contexts.<sup>a,b</sup>

| Sequence Context            | Conformation                | Base Pair     | H-Bond     | Occupancy (%) |
|-----------------------------|-----------------------------|---------------|------------|---------------|
| CXC                         | <i>anti</i> base-displaced  | 5'-C(5):G(18) | O2•••H2-N2 | 99.9          |
|                             |                             |               | N3•••H1-N1 | 99.9          |
|                             |                             |               | N4-H4•••O6 | 98.9          |
|                             |                             | 3'-C(7):G(16) | O2•••H2-N2 | 99.9          |
|                             |                             |               | N3•••H1-N1 | 99.9          |
|                             |                             |               | N4-H4•••O6 | 98.2          |
|                             | <i>syn</i> base-displaced   | 5'-C(5):G(18) | O2•••H2-N2 | 99.7          |
|                             |                             |               | N3•••H1-N1 | 99.9          |
|                             |                             |               | N4-H4•••O6 | 98.9          |
|                             |                             | 3'-C(7):G(16) | O2•••H2-N2 | 99.8          |
|                             |                             |               | N3•••H1-N1 | 99.9          |
|                             |                             |               | N4-H4•••O6 | 98.9          |
|                             | <i>anti</i> 5'-intercalated | 5'-C(5):G(18) | O2•••H2-N2 | 99.9          |
|                             |                             |               | N3•••H1-N1 | 99.9          |
|                             |                             |               | N4-H4•••O6 | 99.1          |
|                             |                             | 3'-C(7):G(16) | N3•••H1-N1 | 99.9          |
|                             |                             |               | N4-H4•••O6 | 99.1          |
|                             |                             |               | O2•••H2-N2 | 96.9          |
|                             | <i>syn</i> 5'-intercalated  | 5'-C(5):G(18) | O2•••H2-N2 | 99.9          |
|                             |                             |               | N3•••H1-N1 | 99.9          |
|                             |                             |               | N4-H4•••O6 | 98.9          |
|                             |                             | 3'-C(7):T(17) | O4•••H4-N4 | 83.7          |
|                             |                             |               | N3•••H3-N3 | 74.4          |
|                             |                             |               |            |               |
| <i>anti</i> 3'-intercalated | 5'-C(5):T(17)               | N4-H4•••O4    | 36.5       |               |
|                             |                             |               |            |               |
|                             |                             |               |            |               |
|                             | 3'-C(7):G(16)               | O2•••H2-N2    | 99.7       |               |
|                             |                             | N3•••H1-N1    | 99.9       |               |
|                             |                             | N4-H4•••O6    | 98.6       |               |
| <i>syn</i> 3'-intercalated  | 5'-C(5):G(18)               | O2•••H2-N2    | 99.5       |               |
|                             |                             | N3•••H1-N1    | 99.1       |               |
|                             |                             | N4-H4•••O6    | 97.1       |               |
|                             | 3'-C(7):G(16)               | O2•••H2-N2    | 99.5       |               |
|                             |                             | N3•••H1-N1    | 99.9       |               |
|                             |                             | N4-H4•••O6    | 98.7       |               |

|                            |                             |               |               |            |      |
|----------------------------|-----------------------------|---------------|---------------|------------|------|
| <b>GXG</b>                 | <i>anti</i> base-displaced  | 5'-G(5):C(18) | N2-H2•••O2    | 99.9       |      |
|                            |                             |               | N1-H1•••N3    | 99.9       |      |
|                            |                             |               | O6•••N4-H4    | 99.2       |      |
|                            |                             | 3'-G(7):C(16) | N2-H2•••O2    | 99.7       |      |
|                            |                             |               | N1-H1•••N3    | 99.9       |      |
|                            |                             |               | O6•••N4-H4    | 98.9       |      |
|                            | <i>syn</i> base-displaced   | 5'-G(5):C(18) | N2-H2•••O2    | 99.9       |      |
|                            |                             |               | N1-H1•••N3    | 99.9       |      |
|                            |                             |               | O6•••N4-H4    | 99.3       |      |
|                            |                             | 3'-G(7):C(16) | N2-H2•••O2    | 99.8       |      |
|                            |                             |               | N1-H1•••N3    | 99.9       |      |
|                            |                             |               | O6•••N4-H4    | 99.1       |      |
|                            | <i>anti</i> 5'-intercalated | 5'-G(5):C(18) | N2-H2•••O2    | 99.9       |      |
|                            |                             |               | N1-H1•••N3    | 99.9       |      |
|                            |                             |               | O6•••N4-H4    | 99.9       |      |
|                            |                             | 3'-G(7):C(16) | N2-H2•••O2    | 91.6       |      |
|                            |                             |               | N1-H1•••N3    | 92.5       |      |
|                            |                             |               | O6•••N4-H4    | 93.5       |      |
|                            | <i>syn</i> 5'-intercalated  | 5'-G(5):C(18) | N2-H2•••O2    | 99.8       |      |
|                            |                             |               | N1-H1•••N3    | 99.9       |      |
|                            |                             |               | O6•••N4-H4    | 98.4       |      |
|                            | <i>anti</i> 3'-intercalated | 3'-G(7):T(17) | O2•••N1-H1    | 47.2       |      |
|                            |                             |               | 5'-G(5):C(18) | N2-H2•••O2 | 34.1 |
|                            |                             |               |               | N1-H1•••N3 | 34.0 |
| O6•••N4-H4                 |                             | 32.5          |               |            |      |
| 3'-G(7):C(16)              |                             | N2-H2•••O2    | 99.7          |            |      |
|                            |                             | N1-H1•••N3    | 99.2          |            |      |
|                            | O6•••N4-H4                  | 97.9          |               |            |      |
| <i>syn</i> 3'-intercalated | 5'-G(5):C(18)               | N2-H2•••O2    | 99.6          |            |      |
|                            |                             | N1-H1•••N3    | 99.7          |            |      |
|                            |                             | O6•••N4-H4    | 96.1          |            |      |
|                            | 3'-G(7):C(16)               | N2-H2•••O2    | 99.6          |            |      |
|                            |                             | N1-H1•••N3    | 99.9          |            |      |
|                            |                             | O6•••N4-H4    | 99.2          |            |      |



|                             |                             |               |            |      |
|-----------------------------|-----------------------------|---------------|------------|------|
| CXG                         | <i>anti</i> base-displaced  | 5'-C(5):G(18) | O2•••H2-N2 | 99.9 |
|                             |                             |               | N3•••H1-N1 | 99.9 |
|                             |                             |               | N4-H4•••O6 | 98.8 |
|                             |                             | 3'-G(7):C(16) | N2-H2•••O2 | 99.8 |
|                             |                             |               | N1-H1•••N3 | 99.9 |
|                             |                             |               | O6•••N4-H4 | 98.7 |
|                             | <i>syn</i> base-displaced   | 5'-C(5):G(18) | O2•••H2-N2 | 99.7 |
|                             |                             |               | N3•••H1-N1 | 99.9 |
|                             |                             |               | N4-H4•••O6 | 98.9 |
|                             |                             | 3'-G(7):C(16) | N2-H2•••O2 | 99.8 |
|                             |                             |               | N1-H1•••N3 | 99.9 |
|                             |                             |               | O6•••N4-H4 | 99.1 |
|                             | <i>anti</i> 5'-intercalated | 5'-C(5):G(18) | O2•••H2-N2 | 99.9 |
|                             |                             |               | N3•••H1-N1 | 99.9 |
|                             |                             |               | N4-H4•••O6 | 98.7 |
|                             |                             | 3'-G(7):C(16) | N2-H2•••O2 | 98.1 |
|                             |                             |               | N1-H1•••N3 | 98.7 |
|                             |                             |               | O6•••N4-H4 | 98.6 |
|                             | <i>syn</i> 5'-intercalated  | 5'-C(5):G(18) | O2•••H2-N2 | 99.9 |
|                             |                             |               | N3•••H1-N1 | 99.9 |
|                             |                             |               | N4-H4•••O6 | 98.9 |
|                             |                             | 3'-G(7):C(16) | N2-H2•••O2 | 94.5 |
|                             |                             |               | N1-H1•••N3 | 95.6 |
|                             |                             |               | O6•••N4-H4 | 95.5 |
| <i>anti</i> 3'-intercalated | 5'-C(5):G(18)               | O2•••H2-N2    | 44.6       |      |
|                             |                             | N3•••H1-N1    | 44.5       |      |
|                             |                             | N4-H4•••O6    | 50.2       |      |
|                             | 3'-G(7):C(16)               | N2-H2•••O2    | 99.9       |      |
|                             |                             | N1-H1•••N3    | 99.9       |      |
|                             |                             | O6•••N4-H4    | 98.8       |      |
| <i>syn</i> 3'-intercalated  | 5'-C(5):G(18)               | O2•••H2-N2    | 99.5       |      |
|                             |                             | N3•••H1-N1    | 99.4       |      |
|                             |                             | N4-H4•••O6    | 98.8       |      |
|                             | 3'-G(7):C(16)               | N2-H2•••O2    | 99.7       |      |
|                             |                             | N1-H1•••N3    | 99.9       |      |
|                             |                             |               |            |      |

|                             |                             |               |               |            |      |
|-----------------------------|-----------------------------|---------------|---------------|------------|------|
| <b>GXC</b>                  | <i>anti</i> base-displaced  | 5'-G(5):C(18) | O6•••N4-H4    | 99.1       |      |
|                             |                             |               | N2-H2•••O2    | 99.8       |      |
|                             |                             |               | N1-H1•••N3    | 99.9       |      |
|                             |                             | 3'-C(7):G(16) | O6•••N4-H4    | 99.3       |      |
|                             |                             |               | O2•••H2-N2    | 99.9       |      |
|                             |                             |               | N3•••H1-N1    | 99.9       |      |
|                             | <i>syn</i> base-displaced   | 5'-G(5):C(18) | N2-H2•••O2    | 99.8       |      |
|                             |                             |               | N1-H1•••N3    | 99.9       |      |
|                             |                             |               | O6•••N4-H4    | 99.4       |      |
|                             |                             | 3'-C(7):G(16) | O2•••H2-N2    | 99.8       |      |
|                             |                             |               | N3•••H1-N1    | 99.9       |      |
|                             |                             |               | N4-H4•••O6    | 99.1       |      |
|                             | <i>anti</i> 5'-intercalated | 5'-G(5):C(18) | N2-H2•••O2    | 99.8       |      |
|                             |                             |               | N1-H1•••N3    | 99.9       |      |
|                             |                             |               | O6•••N4-H4    | 99.0       |      |
|                             |                             | 3'-C(7):G(16) | O2•••H2-N2    | 95.3       |      |
|                             |                             |               | 3'-C(7):T(17) | N4-H4•••O4 | 52.1 |
|                             |                             |               |               | N3•••H2-N2 | 39.7 |
|                             | <i>syn</i> 5'-intercalated  | 5'-G(5):C(18) | N2-H2•••O2    | 99.8       |      |
|                             |                             |               | N1-H1•••N3    | 99.9       |      |
|                             |                             |               | O6•••N4-H4    | 98.6       |      |
|                             |                             | 3'-C(7):G(16) | O2•••H2-N2    | 80.3       |      |
|                             |                             |               | 3'-C(7):T(17) | N4-H4•••O4 | 89.7 |
|                             |                             |               |               | N3•••H3-N3 | 80.6 |
| <i>anti</i> 3'-intercalated | 5'-G(5):C(18)               | N2-H2•••O2    | 99.2          |            |      |
|                             |                             | N1-H1•••N3    | 99.3          |            |      |
|                             |                             | O6•••N4-H4    | 97.9          |            |      |
|                             | 3'-C(7):G(16)               | O2•••H2-N2    | 99.8          |            |      |
|                             |                             | N3•••H1-N1    | 99.9          |            |      |
|                             |                             | N4-H4•••O6    | 98.4          |            |      |
| <i>syn</i> 3'-intercalated  | 5'-G(5):C(18)               | N2-H2•••O2    | 99.9          |            |      |
|                             |                             | N1-H1•••N3    | 99.9          |            |      |
|                             |                             | O6•••N4-H4    | 99.5          |            |      |
|                             | 3'-C(7):G(16)               | O2•••H2-N2    | 99.9          |            |      |
|                             |                             | N3•••H1-N1    | 99.9          |            |      |

N4–H4•••O6

98.5

<sup>a</sup>Hydrogen-bond distance cut-off within 3.4 Å heavy atom separation and 120° X–H–X angle. <sup>b</sup>Nucleotides in the 11-mer DNA are numbered starting from the 5'–side of each strand, with the strand containing the lesion numbered first.

**Table S4:** Average pseudostep parameters,<sup>a</sup> minor groove width,<sup>b</sup> and standard deviations for each adducted DNA conformer in different sequence contexts.

| Sequence Context | Conformer                   | Shift (Å) | Slide (Å) | Rise (Å) | Tilt (°)  | Roll (°)  | Twist (°) | Minor Groove (Å) |
|------------------|-----------------------------|-----------|-----------|----------|-----------|-----------|-----------|------------------|
| <b>GXG</b>       | unmodified                  | 0.1±0.7   | -1.6±1.3  | 6.8±0.4  | -1.9±5.0  | 5.4±7.0   | 65.0±6.0  | 7.2±1.5          |
|                  | <i>anti</i> base-displaced  | -1.5±0.7  | 1.3±1.1   | 6.7±0.3  | 0.7±4.8   | -4.4±5.5  | 57.1±6.0  | 7.7±1.2          |
|                  | <i>anti</i> 5'-intercalated | -1.9±1.1  | 1.6±1.8   | 9.5±0.6  | -19.3±6.5 | -1.1±9.8  | 46.2±11.3 | 16.3±4.5         |
|                  | <i>anti</i> 3'-intercalated | -1.6±0.9  | 2.1±1.0   | 10.1±0.4 | -4.2±5.3  | -4.4±8.2  | 46.3±7.1  | 10.5±1.8         |
|                  | <i>syn</i> base-displaced   | -1.4±0.9  | 0.7±1.1   | 6.7±0.3  | 2.5±4.9   | 6.1±6.1   | 51.4±6.3  | 9.1±1.7          |
|                  | <i>syn</i> 5'-intercalated  | -1.7±1.2  | 0.9±1.6   | 9.6±0.8  | -9.1±9.3  | -3.8±10.4 | 54.4±11.8 | 14.6±3.3         |
|                  | <i>syn</i> 3'-intercalated  | -1.5±1.0  | 0.9±1.2   | 10.0±0.7 | -8.9±5.5  | 6.6±8.3   | 50.4±7.7  | 11.5±1.7         |
| <b>CXG</b>       | unmodified                  | 0.0±0.8   | -1.6±1.0  | 6.7±0.4  | 0.1±5.2   | 11.3±8.4  | 62.9±6.3  | 7.7±1.4          |
|                  | <i>anti</i> base-displaced  | -1.6±0.7  | 1.0±1.0   | 6.8±0.3  | -1.5±5.0  | -3.8±5.9  | 56.5±5.1  | 7.4±1.4          |
|                  | <i>anti</i> 5'-intercalated | -2.1±1.0  | 0.5±1.5   | 9.4±0.5  | -17.0±6.9 | -2.0±9.6  | 38.7±14.6 | 10.2±3.1         |
|                  | <i>anti</i> 3'-intercalated | -0.9±1.5  | 1.9±1.4   | 9.1±0.8  | -6.2±7.9  | -3.2±13.3 | 48.9±12.1 | 12.9±2.8         |
|                  | <i>syn</i> base-displaced   | -1.9±0.9  | 0.6±1.1   | 6.8±0.4  | 1.2±5.3   | 6.4±6.9   | 48.8±5.9  | 8.7±1.7          |
|                  | <i>syn</i> 5'-intercalated  | -2.2±1.1  | -0.2±1.0  | 9.8±0.6  | -16.6±6.9 | -1.3±9.0  | 50.5±8.0  | 7.9±1.7          |
|                  | <i>syn</i> 3'-intercalated  | -1.6±1.2  | 1.4±1.5   | 10.0±0.7 | -9.5±6.0  | 6.3±9.5   | 47.2±8.3  | 11.2±2.0         |
| <b>GXC</b>       | unmodified                  | 0.2±0.7   | -1.4±1.1  | 6.6±0.4  | -0.9±5.1  | 3.1±7.0   | 66.9±6.1  | 6.9±1.5          |
|                  | <i>anti</i> base-displaced  | -1.4±0.7  | 0.9±0.9   | 6.8±0.3  | -0.5±4.9  | -5.1±5.6  | 57.8±4.7  | 7.8±1.3          |
|                  | <i>anti</i> 5'-intercalated | -1.5±0.9  | 1.0±1.0   | 9.0±0.5  | -14.5±6.3 | -1.5±8.4  | 51.5±7.0  | 14.5±3.8         |
|                  | <i>anti</i> 3'-intercalated | -1.6±1.2  | 1.3±1.2   | 10.0±0.5 | -9.9±6.4  | -2.6±9.4  | 48.3±9.4  | 10.1±1.8         |
|                  | <i>syn</i> base-displaced   | -1.6±0.8  | -0.2±1.2  | 6.8±0.3  | 0.8±4.9   | 5.9±6.3   | 54.4±6.0  | 8.4±1.5          |
|                  | <i>syn</i> 5'-intercalated  | -1.5±1.0  | -0.9±1.2  | 8.7±0.5  | -7.7±6.5  | 7.4±10.6  | 45.3±10.3 | 10.1±2.3         |
|                  | <i>syn</i> 3'-intercalated  | -1.7±1.0  | 2.1±0.9   | 10.3±0.5 | -9.3±5.0  | 1.7±8.8   | 48.6±8.0  | 10.4±1.8         |
| <b>CXC</b>       | unmodified                  | 0.3±0.8   | -1.3±1.0  | 6.5±0.4  | 1.9±5.2   | 8.6±7.8   | 63.1±6.0  | 7.2±1.5          |
|                  | <i>anti</i> base-displaced  | -1.6±0.7  | 0.8±0.8   | 6.9±0.3  | -2.1±5.0  | -5.2±5.9  | 56.8±4.8  | 7.6±1.2          |
|                  | <i>anti</i> 5'-intercalated | -2.2±1.1  | 0.5±1.0   | 9.0±0.7  | -14.9±6.7 | -0.7±9.0  | 45.9±9.3  | 9.9±2.0          |
|                  | <i>anti</i> 3'-intercalated | -0.5±1.2  | 1.4±1.2   | 9.1±1.0  | -7.2±7.0  | -1.5±9.1  | 54.5±9.2  | 11.5±2.7         |
|                  | <i>syn</i> base-displaced   | -1.9±0.9  | 0.0±1.2   | 6.9±0.4  | 0.7±5.1   | 7.7±8.1   | 51.2±6.1  | 7.7±1.7          |
|                  | <i>syn</i> 5'-intercalated  | -1.0±1.5  | -1.0±1.7  | 8.9±0.7  | -10.1±8.4 | 5.1±10.4  | 53.0±8.4  | 11.6±1.7         |
|                  | <i>syn</i> 3'-intercalated  | -1.7±1.1  | 1.5±1.4   | 10.1±0.6 | -11.1±5.4 | 7.5±9.5   | 47.3±8.3  | 9.5±2.0          |

<sup>a</sup>Calculated using the 3' and 5'-flanking base pairs. <sup>c</sup>Calculated as the distance between the P atom of the 7<sup>th</sup> and the 20<sup>th</sup> residue minus 5.8 Å to account for the van der Waals radii of the two phosphate groups.

**Table S5:** Interaction energies between the adduct and the opposing thymine for the base-displaced intercalated conformations of ALI-N<sup>6</sup>-dA adducted DNA in different sequence contexts derived from 20 ns MD simulations (kJ mol<sup>-1</sup>).

| Sequence Context | Conformation               | E <sub>vdW</sub> + E <sub>elec</sub> |
|------------------|----------------------------|--------------------------------------|
| <b>GXG</b>       | <i>anti</i> base-displaced | -18.9±3.8                            |
|                  | <i>syn</i> base-displaced  | -10.5±4.4                            |
| <b>CXG</b>       | <i>anti</i> base-displaced | -18.1±4.2                            |
|                  | <i>syn</i> base-displaced  | -8.4±4.6                             |
| <b>GXC</b>       | <i>anti</i> base-displaced | -17.6±4.2                            |
|                  | <i>syn</i> base-displaced  | -10.1±3.3                            |
| <b>CXC</b>       | <i>anti</i> base-displaced | -15.5±5.0                            |
|                  | <i>syn</i> base-displaced  | -8.0±4.6                             |
